# Supplementary material for: Nutritional Status and Quality of Life in Hospitalised Cancer Patients Who Develop Intestinal Failure and Require Parenteral Nutrition: An Observational Study
Source: MDPI journal article supplement (doi:10.3390/nu12082357), 2020-08-07
Supplement: s1 [file s1]

# Supplementary Materials

## 1. Supplementary Tables

Table S1. Data collection timeline

| Parameter              | From patient records (closest measurement to referral) | From dietitian during ward round |
|------------------------|--------------------------------------------------------|----------------------------------|
| Demographics           | X                                                      |                                  |
| Medical information    | X                                                      |                                  |
| Serum biochemistry     | X                                                      |                                  |
| Anthropometric data    |                                                        | X                                |
| Malnutrition screening | X                                                      |                                  |
| Quality of Life        |                                                        | X                                |
| Performance status     |                                                        | X                                |



Please see reverse for appropriate actions and create an individualised patient care plan

| Actions                      |                                                                                                                                                                                                                                                                                                                                                                                                                                                                                                                                                                                                                                                                                                                                                                                                                                                                                                                                                                                                                                                               |
|------------------------------|---------------------------------------------------------------------------------------------------------------------------------------------------------------------------------------------------------------------------------------------------------------------------------------------------------------------------------------------------------------------------------------------------------------------------------------------------------------------------------------------------------------------------------------------------------------------------------------------------------------------------------------------------------------------------------------------------------------------------------------------------------------------------------------------------------------------------------------------------------------------------------------------------------------------------------------------------------------------------------------------------------------------------------------------------------------|
| Score 0-2<br>Low risk        | <p><b>ROUTINE CLINICAL CARE</b><br/><b>Referral to the dietitian is not required</b></p> <ul style="list-style-type: none"> <li>• Weigh and screen patient weekly and document</li> <li>• Ensure that help and advice on appropriate menu choices is provided should the patient require a Kosher, Halal, Caribbean, vegetarian, soft or puree diet</li> </ul>                                                                                                                                                                                                                                                                                                                                                                                                                                                                                                                                                                                                                                                                                                |
| Score 3 – 6<br>Medium risk   | <p><b>OBSERVE</b><br/><b>Referral to the dietitian is not required</b></p> <ul style="list-style-type: none"> <li>• Weigh and screen patient weekly and document.</li> <li>• <b>For any patients on parenteral or enteral nutrition, please ensure that the dietitian is informed</b></li> <li>• Check that any symptoms affecting food intake are adequately controlled, e.g. nausea, vomiting, constipation or abdominal pain</li> <li>• Check patient: <ul style="list-style-type: none"> <li>○ Can reach food/feed self /use utensils/cut up food</li> <li>○ Can chew (check dentures)/swallow</li> <li>○ Has adequate mouth care</li> <li>○ Is positioned correctly for eating and drinking</li> </ul> </li> <li>• Encourage patient to choose ☺ foods from menu.</li> <li>• If assistance with feeding is required inform catering staff of need for <b>red tray/ red jug</b>.</li> <li>• Offer Full Fat Milk/ soups between meals.</li> <li>• Offer the Snack Menu where available for more choice.</li> <li>• Commence food record charts.</li> </ul> |
| Score 7 or more<br>High risk | <p><b>TREAT</b><br/><b>Refer to dietitian</b></p> <ul style="list-style-type: none"> <li>• <b>Refer to the dietitian and commence food record charts for 2-3 days</b></li> <li>• Encourage patient to choose ☺ foods from menu.</li> <li>• If assistance with feeding is required inform catering staff of need for red tray/ red jug.</li> <li>• Offer Full Fat Milk/ soups between meals.</li> <li>• Offer the Snack Menu where available for more choice.</li> </ul>                                                                                                                                                                                                                                                                                                                                                                                                                                                                                                                                                                                       |

Table S3. Agreement among categorical variables of nutritional status with Cohen's kappa.

| Variable                 | Kappa  | P-value |
|--------------------------|--------|---------|
| <b>PG-SGA categories</b> |        |         |
| NST categories           | -0.147 | 0.292   |
| Weight loss% categories  | 0.022  | 0.820   |
| BMI categories           | -0.027 | 0.898   |
| <b>NST categories</b>    |        |         |
| Weight loss % categories | 0.007  | 0.929   |
| BMI categories           | -0.090 | 0.510   |

BMI = Body Mass Index, Kappa=Cohen's Kappa agreement coefficient, NST = Nutritional screening tool, PG-SGA = Patient Generated Subjective Global Assessment

Table S4. Spearman correlations between variables. Only correlations with  $p < 0.05$  are presented.

| Variable 1          | Variable 2                 | Spearman's rho | p-value | N  |
|---------------------|----------------------------|----------------|---------|----|
| KPS Score           | Length of stay             | -0.448         | 0.015   | 29 |
| NST score           | MUAMC                      | -0.426         | 0.043   | 23 |
| NST score           | Weight on admission        | -0.455         | 0.022   | 25 |
| NST score           | Weight loss in 6months (%) | 0.502          | 0.015   | 23 |
| TSF                 | MUAMC                      | 0.727          | 0.000   | 27 |
| TSF                 | BMI on admission           | 0.531          | 0.005   | 26 |
| TSF                 | Weight on admission        | 0.469          | 0.014   | 27 |
| TSF                 | Weight loss in 6months (%) | 0.425          | 0.034   | 25 |
| MAC                 | BMI on admission           | 0.553          | 0.003   | 26 |
| MAC                 | Weight on admission        | 0.683          | 0.000   | 27 |
| MAC                 | MUAMC                      | 0.770          | 0.000   | 27 |
| MUAMC               | BMI on admission           | 0.805          | 0.000   | 26 |
| MUAMC               | Weight on admission        | 0.830          | 0.000   | 27 |
| MUAMC               | Weight loss in 6months     | 0.475          | 0.017   | 25 |
| MUAMC               | Weight loss in 6months (%) | 0.580          | 0.002   | 25 |
| HGS                 | Weight on admission        | 0.386          | 0.047   | 27 |
| HGS                 | MAC                        | 0.440          | 0.022   | 27 |
| HGS                 | KPS                        | 0.531          | 0.004   | 27 |
| Energy/independence | Age                        | 0.525          | 0.018   | 20 |
| Pain                | HGS                        | -0.474         | 0.040   | 19 |

BMI = Body Mass Index, HGS = hand grip strength, KPS = Karnofsky Performance Status, MAC = mid arm circumference, MUAMC = mid upper arm muscle circumference, NST = Nutritional screening tool, TSF = tricep skinfold thickness.

Table S5. Cancer cachexia distribution according to type of malignancy, KPS score, metastatic disease, and indication for PN.

|                    |                                            | Cancer Cachexia<br>[N(%)] |           | $\chi^2$<br>p-value |
|--------------------|--------------------------------------------|---------------------------|-----------|---------------------|
|                    |                                            | No                        | Yes       |                     |
| Type of malignancy |                                            |                           |           |                     |
|                    | Gynaecological                             | 0 (0.0)                   | 2 (11.1)  | 0.082               |
|                    | Upper Gastrointestinal                     | 2(25.0)                   | 7 (38.9)  |                     |
|                    | Lower Gastrointestinal                     | 0 (0.0)                   | 4 (22.2)  |                     |
|                    | Haematological                             | 4 (50.0)                  | 5 (27.8)  |                     |
|                    | Other                                      | 2 (25.0)                  | 0 (0.0)   |                     |
| KPS                |                                            |                           |           |                     |
|                    | <50                                        | 3 (37.5)                  | 4 (22.2)  | 0.418               |
|                    | ≥50                                        | 5 (62.5)                  | 14 (77.8) |                     |
| Metastasis         |                                            |                           |           |                     |
|                    | No                                         | 6 (75.0)                  | 8 (38.9)  | 0.089               |
|                    | Yes                                        | 2 (25.0)                  | 11 (61.1) |                     |
| Indication for HPN |                                            |                           |           |                     |
|                    | Extensive small bowel mucosal disease      | 4 (44.4)                  | 8 (38.1)  | 0.671               |
|                    | Intestinal dysmotility                     | 2 (22.2)                  | 2 (9.5)   |                     |
|                    | Mechanical obstruction                     | 3 (33.3)                  | 10 (47.6) |                     |
|                    | Short bowel syndrome or intestinal fistula | 0 (0.0)                   | 1 (4.8)   |                     |

Gynaecological: breast, endometrial; Lower gastrointestinal: small bowel, colon, sigmoid; upper gastrointestinal: oesophageal, gastric; haematological: leukaemia, lymphoma, amyloidosis; other: penis, bladder, HPN=Home Parenteral Nutrition, KPS=Karnofsky Performance Status.

Table S6. Metastatic disease distribution according to type of malignancy, KPS score, and indication for PN.

|                                            | Metastatic Disease<br>[N (%)] |           | $\chi^2$<br>p- value |
|--------------------------------------------|-------------------------------|-----------|----------------------|
|                                            | No                            | Yes       |                      |
| Type of malignancy                         |                               |           |                      |
| Gynaecological                             | 0 (0.0)                       | 2 (14.3)  | 0.021                |
| Upper Gastrointestinal                     | 5 (31.3)                      | 6 (42.9)  |                      |
| Lower Gastrointestinal                     | 0 (0.0)                       | 4 (28.6)  |                      |
| Haematological                             | 10 (62.5)                     | 1 (7.1)   |                      |
| Other                                      | 1 (6.3)                       | 1 (7.1)   |                      |
| KPS                                        |                               |           |                      |
| <50                                        | 7 (43.8)                      | 2 (14.3)  | 0.084                |
| ≥50                                        | 9 (56.3)                      | 12 (85.7) |                      |
| Indication for HPN                         |                               |           |                      |
| Extensive small bowel mucosal disease      | 11 (68.8)                     | 1 (7.1)   | 0.001                |
| Intestinal dysmotility                     | 3 (18.8)                      | 1 (7.1)   |                      |
| Mechanical obstruction                     | 2 (12.5)                      | 11 (78.6) |                      |
| Short bowel syndrome or intestinal fistula | 0 (0.0)                       | 1 (7.1)   |                      |

Gynaecological: breast, endometrial; Lower gastrointestinal: small bowel, colon, sigmoid; upper gastrointestinal: oesophageal, gastric; haematological: leukaemia, lymphoma, amyloidosis; other: penis, bladder, HPN=Home Parenteral Nutrition, KPS=Karnofsky Performance Status.

Table S7. NST score distribution according to type of malignancy, KPS score, cachexia, metastatic disease, and indication for PN.

|                                            | NST scores<br>[N (%)] |                |              | $\chi^2$<br>p- value |
|--------------------------------------------|-----------------------|----------------|--------------|----------------------|
|                                            | Low risk              | Medium<br>Risk | High<br>Risk |                      |
| Type of malignancy                         |                       |                |              |                      |
| Gynaecological                             | 0 (0.0)               | 1 (25.0)       | 1 (6.3)      | 0.623                |
| Upper Gastrointestinal                     | 1 (20.0)              | 1 (25.0)       | 6 (37.5)     |                      |
| Lower Gastrointestinal                     | 0 (0.0)               | 0 (0.0)        | 3 (18.8)     |                      |
| Haematological                             | 3 (60.0)              | 2 (50.0)       | 5 (31.3)     |                      |
| Other                                      | 1 (20.0)              | 0 (0.0)        | 1 (6.3)      |                      |
| KPS                                        |                       |                |              |                      |
| <50                                        | 1 (20.0)              | 1 (25.0)       | 3 (18.8)     | 0.962                |
| ≥50                                        | 4 (80.0)              | 3 (75.0)       | 13 (81.3)    |                      |
| Cancer Cachexia                            |                       |                |              |                      |
| No                                         | 3 (60.0)              | 2 (50.0)       | 2 (14.3)     | 0.105                |
| Yes                                        | 3 (40.0)              | 2 (50.0)       | 12 (85.7)    |                      |
| Metastasis                                 |                       |                |              |                      |
| No                                         | 4 (80.0)              | 2 (50.0)       | 7 (43.8)     | 0.365                |
| Yes                                        | 1 (20.0)              | 2 (50.0)       | 9 (56.3)     |                      |
| Indication for HPN                         |                       |                |              |                      |
| Extensive small bowel mucosal disease      | 4 (80.0)              | 1 (25.0)       | 5 (31.3)     | 0.483                |
| Intestinal dysmotility                     | 0 (0.0)               | 0 (0.0)        | 2 (12.5)     |                      |
| Mechanical obstruction                     | 1 (20.0)              | 3 (75.0)       | 8 (50.0)     |                      |
| Short bowel syndrome or intestinal fistula | 0 (0.0)               | 0 (0.0)        | 1 (6.3)      |                      |

Gynaecological: breast, endometrial; Lower gastrointestinal: small bowel, colon, sigmoid; upper gastrointestinal: oesophageal, gastric; haematological: leukaemia, lymphoma, amyloidosis; other: penis, bladder, HPN=Home Parenteral Nutrition, KPS=Karnofsky Performance Status, NST=Nutritional Screening Tool.

Table S8. PG-SGA score distribution according to type of malignancy, KPS score, cachexia, metastatic disease, and indication for PN.

|                                            | PG-SGA scores<br>[N (%)] |           | $\chi^2$<br>p- value |
|--------------------------------------------|--------------------------|-----------|----------------------|
|                                            | Medium Risk              | High Risk |                      |
| Type of malignancy                         |                          |           |                      |
| Gynaecological                             | 0 (0.0)                  | 1 (5.9)   | 0.909                |
| Upper Gastrointestinal                     | 2 (28.6)                 | 6 (35.3)  |                      |
| Lower Gastrointestinal                     | 1 (14.3)                 | 3 (17.6)  |                      |
| Haematological                             | 3 (42.9)                 | 6 (35.3)  |                      |
| Other                                      | 1 (14.3)                 | 1 (5.9)   |                      |
| KPS                                        |                          |           |                      |
| <50                                        | 2 (28.6)                 | 4 (23.5)  | 0.795                |
| ≥50                                        | 5 (71.4)                 | 13 (76.5) |                      |
| Cancer Cachexia                            |                          |           |                      |
| No                                         | 2 (28.6)                 | 5 (33.3)  | 0.823                |
| Yes                                        | 5 (71.4)                 | 10 (66.7) |                      |
| Metastasis                                 |                          |           |                      |
| No                                         | 4 (57.1)                 | 9 (52.9)  | 0.851                |
| Yes                                        | 3 (42.9)                 | 8 (47.1)  |                      |
| Indication for HPN                         |                          |           |                      |
| Extensive small bowel mucosal disease      | 2 (28.6)                 | 6 (35.3)  | 0.467                |
| Intestinal dysmotility                     | 1 (14.3)                 | 3 (17.6)  |                      |
| Mechanical obstruction                     | 3 (49.2)                 | 8 (47.1)  |                      |
| Short bowel syndrome or intestinal fistula | 1 (14.3)                 | 0 (0.0)   |                      |

Gynaecological: breast, endometrial; Lower gastrointestinal: small bowel, colon, sigmoid; upper gastrointestinal: oesophageal, gastric; haematological: leukaemia, lymphoma, amyloidosis; other: penis, bladder, HPN=Home Parenteral Nutrition, KPS=Karnofsky Performance Status, PG-SGA=Patient Generated Subjective Global Assessment.

Table S9. Factor analysis and structure.

|                                 | Questions                                                                                        | Factors |        |       |       |       |
|---------------------------------|--------------------------------------------------------------------------------------------------|---------|--------|-------|-------|-------|
|                                 |                                                                                                  | 1       | 2      | 3     | 4     | 5     |
| <b>Pain</b>                     | Have you had pain after eating or drinking?                                                      | -0.912  |        |       |       |       |
|                                 | Have you had other pain?                                                                         | -0.875  |        |       |       |       |
|                                 | Have you had aches or pains in your muscles or joints?                                           | -0.749  |        |       |       |       |
|                                 | Were you able to eat food?                                                                       | -0.743  |        |       |       |       |
|                                 | Have you had nausea/vomiting?                                                                    | -0.702  |        |       |       |       |
|                                 | Have you had trouble taking a short walk outside the house?                                      | -0.685  |        |       |       |       |
| <b>Worrying</b>                 | Have you worried about the future?                                                               |         | -0.897 |       |       |       |
|                                 | Have you worried about your current health?                                                      |         | -0.848 |       |       |       |
|                                 | Have you felt bloated?                                                                           |         | -0.612 |       |       |       |
| <b>Walking/<br/>socialising</b> | Have you had trouble taking a long walk?                                                         |         |        | 0.852 |       |       |
|                                 | Were you able to go out to work?                                                                 |         |        | 0.684 |       |       |
|                                 | Have you felt you wanted to go out to work?                                                      |         |        | 0.602 |       |       |
|                                 | Were you able to socialise?                                                                      |         |        | 0.578 |       |       |
|                                 | Have you needed help with eating, dressing, washing yourself or using the toilet?                |         |        | 0.547 |       |       |
|                                 | Were you able to feel independent?                                                               |         |        |       | 0.853 |       |
| <b>Energy/<br/>independence</b> | Have you felt depressed?                                                                         |         |        |       | 0.674 |       |
|                                 | Were you able to cope with daily life?                                                           |         |        |       | 0.647 |       |
|                                 | Were you able to drink fluids?                                                                   |         |        |       | 0.625 |       |
|                                 | Have you felt lacking in energy?                                                                 |         |        |       | 0.622 |       |
|                                 | Have you felt tired?                                                                             |         |        |       | 0.554 |       |
| <b>Activities</b>               | Have you had trouble doing strenuous activities, like carrying a heavy shopping bag or suitcase? |         |        |       |       | 0.697 |
|                                 | Were you able to take part in hobbies or leisure activities?                                     |         |        |       |       | 0.688 |
|                                 | Were you able to do shopping?                                                                    |         |        |       |       | 0.666 |
|                                 | Were you able to exercise?                                                                       |         |        |       |       | 0.638 |



Table S10. Quality of Life according to type of malignancy, indication for PN, presence of metastases and cachexia, NST, PG-SGA, KPS and WHO-PS scores.

|                           | FACT-G      | FACT-G<br>PHYSICAL | FACT-G<br>SOCIAL | FACT-G<br>EMOTIONAL | FACT-G<br>FUNCTIONAL | Pain       | Worrying   | Walking/<br>Socialising | Energy/<br>Independence | Activities |
|---------------------------|-------------|--------------------|------------------|---------------------|----------------------|------------|------------|-------------------------|-------------------------|------------|
| <b>Type of malignancy</b> |             |                    |                  |                     |                      |            |            |                         |                         |            |
| Gynaecological            | 30.0        | 10.0               | 24.0             | 24.0                | 6.0                  | 1.8        | -0.6       | 0.8                     | -0.5                    | -0.9       |
| Upper Gastrointestinal    | 26.0 (8.4)  | 9.35 (3.6)         | 21.9 (7.2)       | 12.7 (5.8)          | 12.3 (6.7)           | 0.3 (0.5)  | 0.2 (1.1)  | -0.2 (0.7)              | 0.0 (0.8)               | 0.3 (1.3)  |
| Lower Gastrointestinal    | 32.1 (11.7) | 13.7 (5.7)         | 25.1 (1.9)       | 16.3 (2.5)          | 13.5 (8.2)           | -0.2 (1.0) | -0.2 (0.7) | 0.2 (0.6)               | 0.0 (1.4)               | 0.7 (0.8)  |
| Haematological            | 24.0 (11.1) | 11.1 (7.2)         | 24.7 (3.0)       | 14.9 (7.7)          | 8.3 (6.2)            | -0.3 (1.2) | 0.1 (0.8)  | 0.3 (1.4)               | -0.2 (1.1)              | -0.3 (0.8) |
| Other                     | 27.7 (13.7) | 12.5 (12.0)        | 14.3 (6.1)       | 14.5 (6.4)          | 10.7 (6.6)           | -0.6 (0.8) | -0.4 (2.3) | -0.9 (0.4)              | 0.8 (1.5)               | -0.4 (0.2) |
| p-value                   | 0.766       | 0.806              | 0.169            | 0.514               | 0.614                | 0.210      | 0.893      | 0.496                   | 0.821                   | 0.422      |
| <b>Metastatic Disease</b> |             |                    |                  |                     |                      |            |            |                         |                         |            |
| No                        | 26.9 (11.0) | 12.9 (5.7)         | 23.7 (4.4)       | 16.2 (6.4)          | 10.0 (6.8)           | -0.3 (0.9) | -0.2 (1.2) | 0.5 (1.2)               | 0.1 (1.2)               | -0.2 (0.9) |
| Yes                       | 26.4 (8.9)  | 9.0 (5.5)          | 22.0 (6.8)       | 13.2 (5.8)          | 11.6 (6.5)           | 0.3 (1.1)  | 0.2 (0.8)  | -0.4 (0.7)              | -0.1 (0.8)              | 0.2 (1.1)  |
| p-value                   | 0.900       | 0.103              | 0.477            | 0.249               | 0.561                | 0.197      | 0.486      | 0.835                   | 0.527                   | 0.416      |
| <b>Cancer Cachexia</b>    |             |                    |                  |                     |                      |            |            |                         |                         |            |
| No                        | 32.2 (10.0) | 14.3 (8.1)         | 20.6 (6.1)       | 17.4 (4.3)          | 13.3 (6.7)           | -0.5 (1.0) | -0.1 (1.5) | 0.3 (1.3)               | 0.2 (1.1)               | -0.6 (0.2) |
| Yes                       | 24.9 (9.8)  | 10.2 (4.1)         | 24.0 (5.4)       | 14.0 (6.3)          | 9.8 (6.9)            | 0.1 (0.9)  | 0.1 (0.8)  | -0.1 (0.9)              | 0.0 (1.0)               | 0.2 (1.1)  |
| p-value                   | 0.136       | 0.130              | 0.219            | 0.249               | 0.316                | 0.204      | 0.672      | 0.445                   | 0.769                   | 0.134      |
| <b>NST</b>                |             |                    |                  |                     |                      |            |            |                         |                         |            |
| Low risk                  | 25.4 (7.1)  | 10.0 (6.0)         | 22.2 (7.4)       | 14.4 (7.8)          | 9.8 (3.6)            | -0.5 (0.9) | 0.9 (0.9)  | 0.7 (1.5)               | 0.1 (0.4)               | 0.0 (0.7)  |
| Medium risk               | 28.0 (18.4) | 14.7 (12.2)        | 25.4 (2.0)       | 17.0 (7.1)          | 11.0 (11.3)          | -1.1       | -1.3       | 0.3                     | -1.2                    | -0.9       |
| High risk                 | 28.1 (10.4) | 10.7 (5.6)         | 23.3 (5.7)       | 14.4 (6.5)          | 12.1 (7.2)           | 0.1 (1.1)  | -0.1 (0.9) | -0.4 (0.8)              | 0.3 (1.1)               | 0.0 (1.2)  |
| p-value                   | 0.884       | 0.667              | 0.819            | 0.877               | 0.812                | 0.344      | 0.075      | 0.203                   | 0.378                   | 0.764      |
| <b>PG-SGA</b>             |             |                    |                  |                     |                      |            |            |                         |                         |            |
| At risk                   | 28.0 (11.1) | 14.2 (6.8)         | 22.0 (7.3)       | 15.4 (6.2)          | 11.2 (6.6)           | -0.6 (0.7) | -0.4 (1.1) | -0.4 (0.8)              | 0.6 (1.1)               | 0.2 (1.4)  |
| Severely malnourished     | 25.8 (9.8)  | 9.4 (5.0)          | 23.5 (5.0)       | 14.8 (6.3)          | 9.9 (6.3)            | 0.2 (1.0)  | 0.2 (0.9)  | 0.1 (1.0)               | -0.3 (0.8)              | -0.1 (0.8) |
| p-value                   | 0.643       | 0.075              | 0.590            | 0.827               | 0.673                | 0.078      | 0.181      | 0.265                   | 0.053                   | 0.508      |
| <b>KPS</b>                |             |                    |                  |                     |                      |            |            |                         |                         |            |
| <50                       | 20.6 (9.5)  | 9.3 (3.2)          | 19.7 (8.9)       | 11.9 (5.4)          | 7.7 (4.7)            | -0.1 (1.0) | 0.3 (0.9)  | 0.1 (1.4)               | -0.3 (0.7)              | -0.4 (0.6) |
| ≥50                       | 28.2 (9.5)  | 11.4 (6.3)         | 23.7 (4.4)       | 15.4 (6.3)          | 11.6 (6.9)           | 0.0 (1.0)  | -0.1 (1.0) | 0.0 (0.8)               | 0.1 (1.1)               | 0.2 (1.1)  |
| p-value                   | 0.127       | 0.475              | 0.164            | 0.268               | 0.254                | 0.855      | 0.433      | 0.750                   | 0.354                   | 0.284      |
| <b>WHO-PS</b>             |             |                    |                  |                     |                      |            |            |                         |                         |            |
| 1                         | 34.7 (11.6) | 10.7 (5.7)         | 25.5 (2.2)       | 18.0 (2.0)          | 14.4 (8.4)           | 0.5 (0.4)  | -0.5 (0.8) | -0.6 (0.1)              | -0.3 (1.6)              | 1.1 (1.9)  |
| 2                         | 27.5 (9.6)  | 11.7 (5.3)         | 24.3 (3.3)       | 15.5 (6.8)          | 11.4 (7.5)           | 0.0 (1.0)  | 0.0 (0.9)  | 0.2 (0.9)               | 0.0 (1.1)               | 0.2 (0.9)  |
| 3                         | 22.8 (8.7)  | 10.1 (7.0)         | 20.1 (7.8)       | 12.5 (5.9)          | 8.7 (4.3)            | -0.1 (1.1) | 0.1 (1.2)  | -0.1 (1.2)              | 0.1 (0.8)               | -0.5 (0.5) |
| p-value                   | 0.178       | 0.848              | 0.167            | 0.351               | 0.411                | 0.774      | 0.697      | 0.640                   | 0.845                   | 0.068      |

Gynaecological: breast, endometrial; Lower gastrointestinal: small bowel, colon, sigmoid; upper gastrointestinal: oesophageal, gastric; haematological: leukaemia, lymphoma, amyloidosis; other: penis, bladder. FACT-G=Functional Assessment of Cancer Therapy: General, NST=Nutritional Screening Tool, PG-SGA=Patient Generated Subjective Global Assessment, KPS= Karnofsky Performance Status, WHO-PS=World Health Organisation Performance Status

## 2. Supplementary Figures

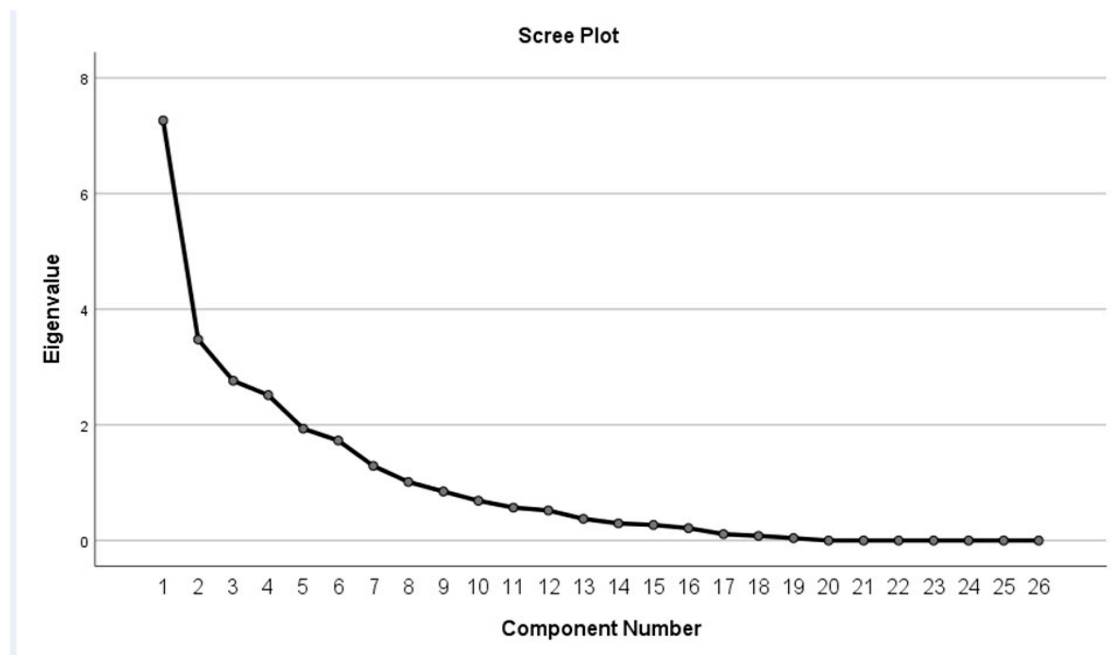

Figure S1. Scree plot. The components lie in the X-axis and the corresponding eigenvalues in the Y-axis. The line drop after the fifth component indicates that the factor analysis identified five factors.
